# Supplementary material
Source: publisher site journal article supplement (https://www.dovepress.com/article/409234)
Supplement: Supplementary file 1 [file get_supplementary_file.php]

**Supplementary materials**

Example 1

A single patient was investigated for persistent mild thrombocytopenia and placed on routine follow-up should the platelet count decrease further. Reflex testing at a globulin level of 13g/L in 4 years later identified low immunoglobulins IgG 4.8g/L (RR 7-16), IgA 0.37 g/L (RR 0.7-4.0) and IgM 0.27g/L (RR0.4-2.3). Serum free light chains were within the reference range and protein electrophoresis did not detect a paraprotein. Review by the immunologist identified viral warts, and 5 courses of antibiotics for respiratory infections in the last 12 months. The patient was diagnosed with immune deficiency (CVID) and treated with antibody infusions.

Example 2

Low immunoglobulins were reported in a patient on the basis of reflex testing for low globulins which was 15g/L in 2016. Immunoglobulins levels were IgG=5.2g/L (Reference range (RR) 7-16), IgA=0.71g/L (RR 0.7-4.0), IgM=0.31g/L (RR 0.4-2.3). Further investigation of low immunoglobulins was recommended at that time. Repeat reflex testing 2 years later detected persistent low immunoglobulins, IgG 3.1g/L, IgA=0.41g/L and IgM=0.27g/L. Further tests added by the laboratory, identified abnormal serum free light chains, kappa =7.99 mg/L (RR3.3-19.4), lambda=549.4 mg/L (RR5.7-26.3). Assessment by the hematology specialist detected 20% plasma cells in the bone marrow and associated vertebral lesions. The patient was diagnosed with light chain myeloma and treatment commenced.

Example 3

A patient with a past history of hypertension, previous thymectomy, presented with peripheral neuropathy. Review suggested low immunoglobulins, found by reflex testing, was below reference range in 4 years previously. The patient was admitted for sepsis in 2019 and CT scan showed a recurrence of thymoma. In 2021 the patient’s immunoglobulins remained low (globulin= 14 g/L) and was IgG=<3.0 g/L (RR 7-16 ), IgA=0.11 g/L (RR 0.7-4.0), IgM=0.70 g/L(RR 0.4-2.3). In patients thymoma and unexplained antibody deficiency Good syndrome is a possibility. Further investigation of T and B cell subsets and immunoglobulin replacement for antibody deficiency is required in Good syndrome.29

Example 4

Suppressed immunoglobulins (IgG=3.1 g/L (RR 7-16), IgA <0.10 g/L(RR 0.7-4.0), IgM=0.05 g/L (RR 0.4-2.3)) were detected by reflex testing (globulin 14 g/L) during 2019. Investigation detected decreased serum free light chains (kappa 3.24 mg/L(RR3.3-19.4) and lambda 2.56 mg/L (RR5.7-26.3) and anemia. The patient was assigned to monitoring as ‘idiopathic hypogammaglobulinemia’. The patient was investigated by gastroenterology specialists for long standing anemia. As part of this study the community physician was contacted in 2021 and the patient was referred to a hematology specialist. Investigation of the bone marrow showed 17% plasma cells and a diagnosis of non-secretory myeloma was made. This included a further 1/139 patients in the detection of new previously unsuspected MM during the course of the study.
